# Supplementary material
Source: Elsevier journal article supplement (https://univ-rennes.hal.science/hal-01468025v1/file/mmc4.pdf)

# checkCIF/PLATON report

Structure factors have been supplied for datablock(s) prueba\_3\_sq

THIS REPORT IS FOR GUIDANCE ONLY. IF USED AS PART OF A REVIEW PROCEDURE FOR PUBLICATION, IT SHOULD NOT REPLACE THE EXPERTISE OF AN EXPERIENCED CRYSTALLOGRAPHIC REFEREE.

No syntax errors found.      CIF dictionary      Interpreting this report

## Datablock: prueba\_3\_sq

---

Bond precision:    C-C = 0.0105 A

Wavelength=0.71070

Cell:                    a=12.058(2)                    b=14.584(3)                    c=17.487(3)  
                          alpha=74.21(3)                beta=71.28(2)                gamma=72.92(2)  
Temperature:            293 K

|                        | Calculated                           | Reported                           |
|------------------------|--------------------------------------|------------------------------------|
| Volume                 | 2729.8(10)                           | 2729.8(11)                         |
| Space group            | P -1                                 | P -1                               |
| Hall group             | -P 1                                 | -P 1                               |
| Moiety formula         | C45 H28 O13 P2 Ru4 S4 [+<br>solvent] | ?                                  |
| Sum formula            | C45 H28 O13 P2 Ru4 S4 [+<br>solvent] | C46.50 H31 Cl1.50 O13 P2<br>Ru4 S4 |
| Mr                     | 1371.14                              | 1445.35                            |
| Dx, g cm <sup>-3</sup> | 1.668                                | 1.758                              |
| Z                      | 2                                    | 2                                  |
| Mu (mm <sup>-1</sup> ) | 1.353                                | 1.429                              |
| F000                   | 1344.0                               | 1419.0                             |
| F000'                  | 1335.80                              |                                    |
| h,k,lmax               | 15,18,22                             | 14,17,22                           |
| Nref                   | 12619                                | 9350                               |
| Tmin,Tmax              |                                      |                                    |
| Tmin'                  |                                      |                                    |

Correction method= Not given

Data completeness= 0.741

Theta(max)= 27.573

R(reflections)= 0.0498( 7057)

wR2(reflections)= 0.1545( 9350)

S = 1.103

Npar= 629

---

The following ALERTS were generated. Each ALERT has the format

**test-name\_ALERT\_alert-type\_alert-level.**

Click on the hyperlinks for more details of the test.

---

### 🔴 Alert level A

EXPT005\_ALERT\_1\_A \_exptl\_crystal\_description is missing  
Crystal habit description.  
The following tests will not be performed.  
CRYSR\_01

DIFF003\_ALERT\_1\_A \_diffrn\_measurement\_device\_type is missing  
Diffractometer make and type. Replaces \_diffrn\_measurement\_type.

PLAT029\_ALERT\_3\_A \_diffrn\_measured\_fraction\_theta\_full value Low . 0.896 Note

PLAT183\_ALERT\_1\_A Missing \_cell\_measurement\_reflms\_used value .... Please Do !

PLAT184\_ALERT\_1\_A Missing \_cell\_measurement\_theta\_min value ..... Please Do !

PLAT185\_ALERT\_1\_A Missing \_cell\_measurement\_theta\_max value ..... Please Do !

---

### 🟡 Alert level B

CHEMW03\_ALERT\_2\_B WARNING: The ratio of given/expected molecular weight as  
calculated from the \_atom\_site\* data lies outside  
the range 0.95 <> 1.05

From the CIF: \_cell\_formula\_units\_Z 2

From the CIF: \_chemical\_formula\_weight 1445.35

TEST: Calculate formula weight from \_atom\_site\*

| atom | mass   | num   | sum    |
|------|--------|-------|--------|
| C    | 12.01  | 45.00 | 540.49 |
| H    | 1.01   | 28.00 | 28.22  |
| P    | 30.97  | 2.00  | 61.95  |
| O    | 16.00  | 13.00 | 207.99 |
| S    | 32.07  | 4.00  | 128.26 |
| Ru   | 101.07 | 4.00  | 404.28 |
| Cl   | 35.45  | 0.00  | 0.00   |

Calculated formula weight 1371.20

PLAT911\_ALERT\_3\_B Missing # FCF Refl Between THmin & STh/L= 0.600 1028 Report

PLAT919\_ALERT\_3\_B Reflection # Likely Affected by the Beamstop ... 1 Check

PLAT934\_ALERT\_3\_B Number of (Iobs-Icalc)/SigmaW > 10 Outliers .... 3 Check

PLAT973\_ALERT\_2\_B Check Calcd Positive Residual Density on Ru1 1.76 eA-3

---

### 🟢 Alert level C

PLAT052\_ALERT\_1\_C Info on Absorption Correction Method Not Given Please Do !

PLAT053\_ALERT\_1\_C Minimum Crystal Dimension Missing (or Error) ... Please Check

PLAT054\_ALERT\_1\_C Medium Crystal Dimension Missing (or Error) ... Please Check

PLAT055\_ALERT\_1\_C Maximum Crystal Dimension Missing (or Error) ... Please Check

PLAT230\_ALERT\_2\_C Hirshfeld Test Diff for C14 -- C15 .. 5.3 s.u.

PLAT234\_ALERT\_4\_C Large Hirshfeld Difference O1 -- C33 .. 0.16 Ang.

PLAT234\_ALERT\_4\_C Large Hirshfeld Difference C11 -- C12 .. 0.18 Ang.

PLAT241\_ALERT\_2\_C High 'MainMol' Ueq as Compared to Neighbors of C15 Check

PLAT242\_ALERT\_2\_C Low 'MainMol' Ueq as Compared to Neighbors of C14 Check

PLAT342\_ALERT\_3\_C Low Bond Precision on C-C Bonds ..... 0.01046 Ang.

PLAT918\_ALERT\_3\_C Reflection(s) with I(obs) much Smaller I(calc) . 1 Check

PLAT973\_ALERT\_2\_C Check Calcd Positive Residual Density on Ru2 1.42 eA-3

PLAT973\_ALERT\_2\_C Check Calcd Positive Residual Density on Ru4 1.36 eA-3

PLAT973\_ALERT\_2\_C Check Calcd Positive Residual Density on Ru3 1.33 eA-3

PLAT978\_ALERT\_2\_C Number C-C Bonds with Positive Residual Density. 0 Note

---

### 🟠 Alert level G

FORMU01\_ALERT\_2\_G There is a discrepancy between the atom counts in the  
\_chemical\_formula\_sum and the formula from the \_atom\_site\* data.

Atom count from \_chemical\_formula\_sum:C46.5 H31 Cl1.5 O13 P2 Ru4 S4  
 Atom count from the \_atom\_site data: C45 H28 O13 P2 Ru4 S4  
 CELLZ01\_ALERT\_1\_G Difference between formula and atom\_site contents detected.  
 CELLZ01\_ALERT\_1\_G ALERT: Large difference may be due to a  
 symmetry error - see SYMMG tests  
 From the CIF: \_cell\_formula\_units\_Z 2  
 From the CIF: \_chemical\_formula\_sum C46.50 H31 Cl1.50 O13 P2 Ru4 S4  
 TEST: Compare cell contents of formula and atom\_site data

| atom | Z*formula | cif sites | diff |
|------|-----------|-----------|------|
| C    | 93.00     | 90.00     | 3.00 |
| H    | 62.00     | 56.00     | 6.00 |
| Cl   | 3.00      | 0.00      | 3.00 |
| O    | 26.00     | 26.00     | 0.00 |
| P    | 4.00      | 4.00      | 0.00 |
| Ru   | 8.00      | 8.00      | 0.00 |
| S    | 8.00      | 8.00      | 0.00 |

|                   |                                                    |        |        |
|-------------------|----------------------------------------------------|--------|--------|
| PLAT002_ALERT_2_G | Number of Distance or Angle Restraints on AtSite   | 25     | Note   |
| PLAT003_ALERT_2_G | Number of Uiso or Uij Restrained non-H Atoms ...   | 10     | Report |
| PLAT041_ALERT_1_G | Calc. and Reported SumFormula Strings Differ       | Please | Check  |
| PLAT051_ALERT_1_G | Mu(calc) and Mu(CIF) Ratio Differs from 1.0 by .   | 5.33   | %      |
| PLAT068_ALERT_1_G | Reported F000 Differs from Calcd (or Missing)...   | Please | Check  |
| PLAT171_ALERT_4_G | The CIF-Embedded .res File Contains EADP Records   | 5      | Report |
| PLAT174_ALERT_4_G | The CIF-Embedded .res File Contains FLAT Records   | 2      | Report |
| PLAT175_ALERT_4_G | The CIF-Embedded .res File Contains SAME Records   | 5      | Report |
| PLAT177_ALERT_4_G | The CIF-Embedded .res File Contains DELU Records   | 2      | Report |
| PLAT178_ALERT_4_G | The CIF-Embedded .res File Contains SIMU Records   | 2      | Report |
| PLAT199_ALERT_1_G | Reported _cell_measurement_temperature ..... (K)   | 293    | Check  |
| PLAT200_ALERT_1_G | Reported _diffrn_ambient_temperature ..... (K)     | 293    | Check  |
| PLAT232_ALERT_2_G | Hirshfeld Test Diff (M-X) Ru4 -- C45 ..            | 5.2    | s.u.   |
| PLAT301_ALERT_3_G | Main Residue Disorder .....(Resd 1)..              | 7      | % Note |
| PLAT606_ALERT_4_G | VERY LARGE Solvent Accessible VOID(S) in Structure | !      | Info   |
| PLAT793_ALERT_4_G | The Model has Chirality at P2 (Centro SPGR)        | S      | Verify |
| PLAT860_ALERT_3_G | Number of Least-Squares Restraints .....           | 184    | Note   |
| PLAT869_ALERT_4_G | ALERTS Related to the use of SQUEEZE Suppressed    | !      | Info   |
| PLAT912_ALERT_4_G | Missing # of FCF Reflections Above STh/L= 0.600    | 2034   | Note   |
| PLAT913_ALERT_3_G | Missing # of Very Strong Reflections in FCF ....   | 1      | Note   |

---

6 **ALERT level A** = Most likely a serious problem - resolve or explain  
 5 **ALERT level B** = A potentially serious problem, consider carefully  
 15 **ALERT level C** = Check. Ensure it is not caused by an omission or oversight  
 23 **ALERT level G** = General information/check it is not something unexpected

16 ALERT type 1 CIF construction/syntax error, inconsistent or missing data  
 13 ALERT type 2 Indicator that the structure model may be wrong or deficient  
 9 ALERT type 3 Indicator that the structure quality may be low  
 11 ALERT type 4 Improvement, methodology, query or suggestion  
 0 ALERT type 5 Informative message, check

---

It is advisable to attempt to resolve as many as possible of the alerts in all categories. Often the minor alerts point to easily fixed oversights, errors and omissions in your CIF or refinement strategy, so attention to these fine details can be worthwhile. In order to resolve some of the more serious problems it may be necessary to carry out additional measurements or structure refinements. However, the purpose of your study may justify the reported deviations and the more serious of these should normally be commented upon in the discussion or experimental section of a paper or in the "special\_details" fields of the CIF. checkCIF was carefully designed to identify outliers and unusual parameters, but every test has its limitations and alerts that are not important in a particular case may appear. Conversely, the absence of alerts does not guarantee there are no aspects of the results needing attention. It is up to the individual to critically assess their own results and, if necessary, seek expert advice.

### **Publication of your CIF in IUCr journals**

A basic structural check has been run on your CIF. These basic checks will be run on all CIFs submitted for publication in IUCr journals (*Acta Crystallographica*, *Journal of Applied Crystallography*, *Journal of Synchrotron Radiation*); however, if you intend to submit to *Acta Crystallographica Section C* or *E* or *IUCrData*, you should make sure that full publication checks are run on the final version of your CIF prior to submission.

### **Publication of your CIF in other journals**

Please refer to the *Notes for Authors* of the relevant journal for any special instructions relating to CIF submission.

### **Validation response form**

Please find below a validation response form (VRF) that can be filled in and pasted into your CIF.

```
# start Validation Reply Form
_vrf_EXPT005_prueba_3_sq
;
PROBLEM: _exptl_crystal_description is missing
RESPONSE: ...
;
_vrf_DIFF003_prueba_3_sq
;
PROBLEM: _diffrn_measurement_device_type is missing
RESPONSE: ...
;
_vrf_PLAT029_prueba_3_sq
;
PROBLEM: _diffrn_measured_fraction_theta_full value Low .      0.896 Note
RESPONSE: ...
;
_vrf_PLAT183_prueba_3_sq
;
PROBLEM: Missing _cell_measurement_reflns_used value ....    Please Do !
RESPONSE: ...
;
_vrf_PLAT184_prueba_3_sq
;
PROBLEM: Missing _cell_measurement_theta_min value .....    Please Do !
RESPONSE: ...
;
_vrf_PLAT185_prueba_3_sq
```

```

;
PROBLEM: Missing _cell_measurement_theta_max value ..... Please Do !
RESPONSE: ...
;
_vrf_PLAT052_prueba_3_sq
;
PROBLEM: Info on Absorption Correction Method Not Given Please Do !
RESPONSE: ...
;
_vrf_PLAT053_prueba_3_sq
;
PROBLEM: Minimum Crystal Dimension Missing (or Error) ... Please Check
RESPONSE: ...
;
_vrf_PLAT054_prueba_3_sq
;
PROBLEM: Medium Crystal Dimension Missing (or Error) ... Please Check
RESPONSE: ...
;
_vrf_PLAT055_prueba_3_sq
;
PROBLEM: Maximum Crystal Dimension Missing (or Error) ... Please Check
RESPONSE: ...
;
_vrf_PLAT230_prueba_3_sq
;
PROBLEM: Hirshfeld Test Diff for C14 -- C15 .. 5.3 s.u.
RESPONSE: ...
;
_vrf_PLAT234_prueba_3_sq
;
PROBLEM: Large Hirshfeld Difference O1 -- C33 .. 0.16 Ang.
RESPONSE: ...
;
_vrf_PLAT241_prueba_3_sq
;
PROBLEM: High 'MainMol' Ueq as Compared to Neighbors of C15 Check
RESPONSE: ...
;
_vrf_PLAT242_prueba_3_sq
;
PROBLEM: Low 'MainMol' Ueq as Compared to Neighbors of C14 Check
RESPONSE: ...
;
_vrf_PLAT342_prueba_3_sq
;
PROBLEM: Low Bond Precision on C-C Bonds ..... 0.01046 Ang.
RESPONSE: ...
;
_vrf_PLAT918_prueba_3_sq
;
PROBLEM: Reflection(s) with I(obs) much Smaller I(calc) . 1 Check
RESPONSE: ...
;
_vrf_PLAT973_prueba_3_sq
;
PROBLEM: Check Calcd Positive Residual Density on Ru2 1.42 eA-3
RESPONSE: ...
;
_vrf_PLAT978_prueba_3_sq
;

```

PROBLEM: Number C-C Bonds with Positive Residual Density.

0 Note

RESPONSE: ...

;

# end Validation Reply Form

---

**PLATON version of 24/11/2016; check.def file version of 23/11/2016**

Datablock prueba\_3\_sq - ellipsoid plot

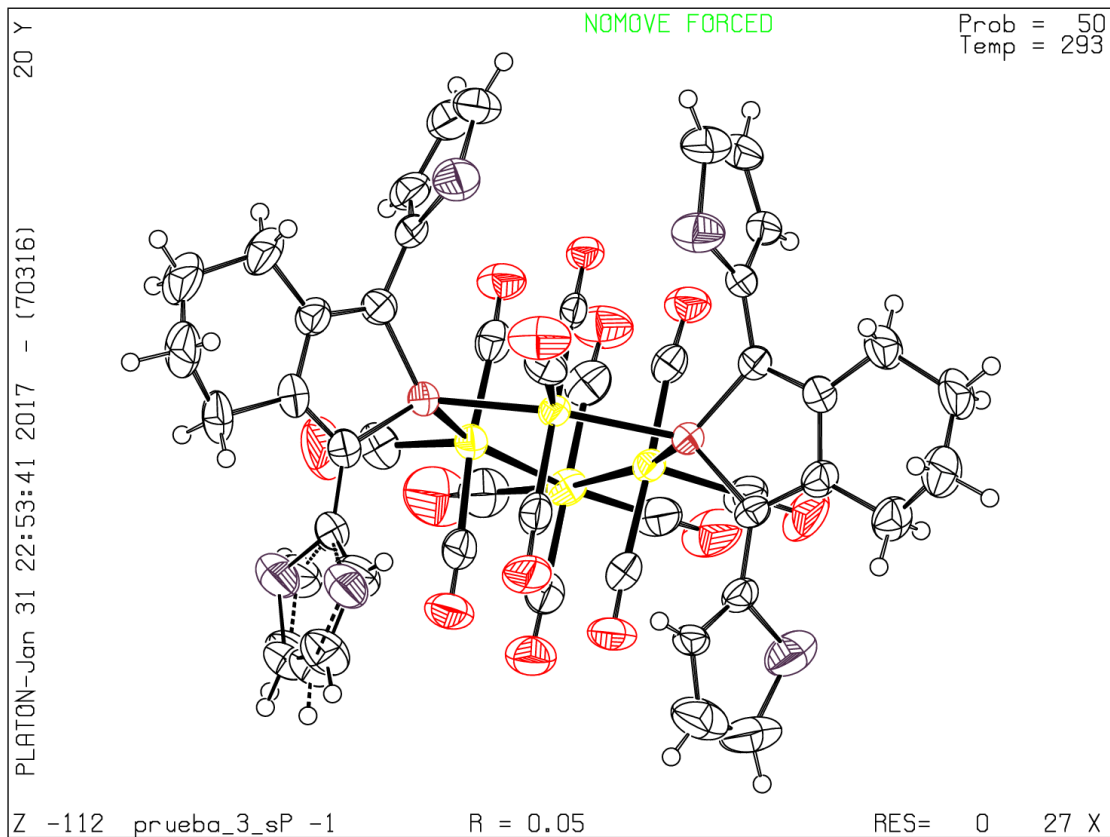

Supplement: mmc4 [file mmc4.pdf]
